1 **PICRUSt2: An improved and customizable approach for metagenome inference**

2 Gavin M. Douglas<sup>1</sup>, Vincent J. Maffei<sup>2</sup>, Jesse Zaneveld<sup>3</sup>, Svetlana N. Yurgel<sup>4</sup>, James R. Brown<sup>5</sup>,

3 Christopher M. Taylor<sup>2</sup>, Curtis Huttenhower<sup>6</sup>, Morgan G. I. Langille<sup>1,7,\*</sup>

4

5 <sup>1</sup>Department of Microbiology and Immunology, Dalhousie University, Halifax, NS, Canada

6 <sup>2</sup>Department of Microbiology, Immunology, and Parasitology, Louisiana State University Health

7 Sciences Center, New Orleans, Louisiana, USA

8 <sup>3</sup>University of Washington, Seattle, Washington, USA

9 <sup>4</sup>Department of Plant, Food, and Environmental Sciences, Dalhousie University, Truro, NS,

10 Canada

11 <sup>5</sup>Computational Biology, GlaxoSmithKline R&D, Collegeville, Pennsylvania, USA

12 <sup>6</sup>Harvard T. H. Chan School of Public Health, Boston, Massachusetts, USA

13 <sup>7</sup>Department of Pharmacology, Dalhousie University, Halifax, Nova Scotia, Canada

14 \*Corresponding author: [morgan.langille@dal.ca](mailto:morgan.langille@dal.ca)

15

16

17

18

19

20

21

22

23

1 One major limitation of microbial community marker gene sequencing is that it does not provide  
2 direct information on the functional composition of sampled communities. Here, we present  
3 PICRUST2 (<https://github.com/picrust/picrust2>), which expands the capabilities of the original  
4 PICRUST method<sup>1</sup> to predict the functional potential of a community based on marker gene  
5 sequencing profiles. This updated method and implementation includes several improvements  
6 over the previous algorithm: an expanded database of gene families and reference genomes, a  
7 new approach now compatible with any OTU-picking or denoising algorithm, and novel  
8 phenotype predictions. Upon evaluation, PICRUST2 was more accurate than PICRUST1 and other  
9 current approaches overall. PICRUST2 is also now more flexible and allows the addition of  
10 custom reference databases. We highlight these improvements and also important caveats  
11 regarding the use of predicted metagenomes, which are related to the inherent challenges of  
12 analyzing metagenome data in general.

13 The most common approach for profiling communities is to sequence the highly  
14 conserved 16S rRNA gene. Functional profiles cannot be directly identified from 16S rRNA  
15 gene sequence data due to strain variation and because 16S rRNA genes are not unique among  
16 microbes, but several approaches have been developed to infer approximate microbial  
17 community functions from taxonomic profiles (and thus amplicon sequences) alone<sup>1-6</sup>.  
18 Importantly, these methods predict functional potential, i.e. functions encoded at the level of  
19 DNA. Although shotgun metagenomic sequencing (MGS) directly samples genetic functional  
20 potential within microbial communities, this methodology is not without limitations. In  
21 particular, functional inference from amplicon data remains important for samples with  
22 substantial host contamination (e.g. biopsy samples), low biomass, and where metagenomic  
23 sequencing is not economically feasible.

1 PICRUST<sup>1</sup> (hereafter “PICRUST1”) was the first tool developed and the most widely used  
2 for metagenome prediction, but like any inference model has several limitations. First, the  
3 standard PICRUST1 workflow requires input sequences to be operational taxonomic units  
4 (OTUs) generated from closed-reference OTU picking against a compatible version of the  
5 Greengenes database<sup>7</sup>. Due to this limitation, the default PICRUST1 workflow is incompatible  
6 with sequence denoising methods<sup>8</sup>, which produce amplicon sequence variants (ASVs) rather  
7 than OTUs. ASVs have finer resolution, allowing closely related organisms to be more readily  
8 distinguished. Lastly, the prokaryotic reference databases used by PICRUST1 have not been  
9 updated since 2013 and lack many recently added gene families and pathway mappings.

10 The PICRUST2 algorithm includes new steps that optimize genome prediction, which we  
11 hypothesized would improve prediction accuracy (**Fig 1**). These are: (1) study sequences are now  
12 placed into a pre-existing phylogeny rather than relying on discrete predictions limited to  
13 reference OTUs (**Fig 1b**); (2) predictions are based off of a greatly increased number of  
14 reference genomes and gene families (**Fig 1c**); (3) pathway abundance inference is now more  
15 stringently performed (**Supp Fig 1**); (4) predictions can now be made for higher level  
16 phenotypes; and (5) custom databases are easier to integrate into the prediction pipeline.

17 PICRUST2 integrates multiple high-throughput, open-source tools to predict the genomes  
18 of environmentally sampled 16S rRNA gene sequences. ASVs are placed into a reference tree,  
19 which is used as the basis of functional predictions. This reference tree contains 20,000 full 16S  
20 rRNA genes from prokaryotic genomes in the Integrated Microbial Genomes (IMG) database<sup>9</sup>.  
21 Phylogenetic placement in PICRUST2 is based on running three tools: HMMER  
22 ([www.hmmer.org](http://www.hmmer.org)) to place ASVs, EPA-ng<sup>10</sup> to determine the optimal position of these placed  
23 ASVs in a reference phylogeny, and GAPPA<sup>11</sup> to output a new tree incorporating the ASV

1 placements. This results in a phylogenetic tree containing both reference genomes and  
2 environmentally sampled organisms, which is used to predict individual gene family copy  
3 numbers for each ASV. This procedure is re-run for each input dataset, allowing users to utilize  
4 custom reference databases as needed, including those that may be optimized for the study of  
5 specific microbial niches.

6 As in PICRUSt1, hidden state prediction (HSP) approaches are used in PICRUSt2 to  
7 infer the genomic content of sampled sequences. The *castor* R package<sup>12</sup>, which is substantially  
8 faster than the *ape* package<sup>13</sup> used previously in PICRUSt1, now performs the core HSP  
9 functions. As in PICRUSt1, ASVs are corrected by their 16S rRNA gene copy number and then  
10 multiplied by their functional predictions to produce a predicted metagenome. PICRUSt2 also  
11 provides the ASV contribution of each predicted function allowing for taxonomy-informed  
12 statistical analyses to be conducted. Lastly, pathway abundances are now inferred based on  
13 structured pathway mappings, which are more conservative than the bag-of-genes approach  
14 previously used in PICRUSt1.

15 The new PICRUSt2 default genome database is based on 41,926 bacterial and archaeal  
16 genomes from the IMG database<sup>9</sup> as of November 8, 2017, which is a >20-fold increase over the  
17 2,011 IMG genomes used for PICRUSt1 predictions. Many of these genomes are from strains of  
18 the same species and have identical 16S rRNA genes. We de-replicated the identical 16S rRNA  
19 genes across these genomes, which resulted in 20,000 final 16S rRNA gene clusters.

20 As a result of this increased database size, the taxonomic diversity of the PICRUSt2  
21 reference database has markedly increased compared to PICRUSt1 (**Fig. 1c**). The clearest  
22 increases in diversity have been driven by increases at the species and genus levels (5.3-fold and

1 2.2-fold increases respectively). However, all taxonomic levels exhibited increased diversity,  
 2 including the phylum level where the coverage increased from 39 to 64 phyla (1.6-fold increase).

3

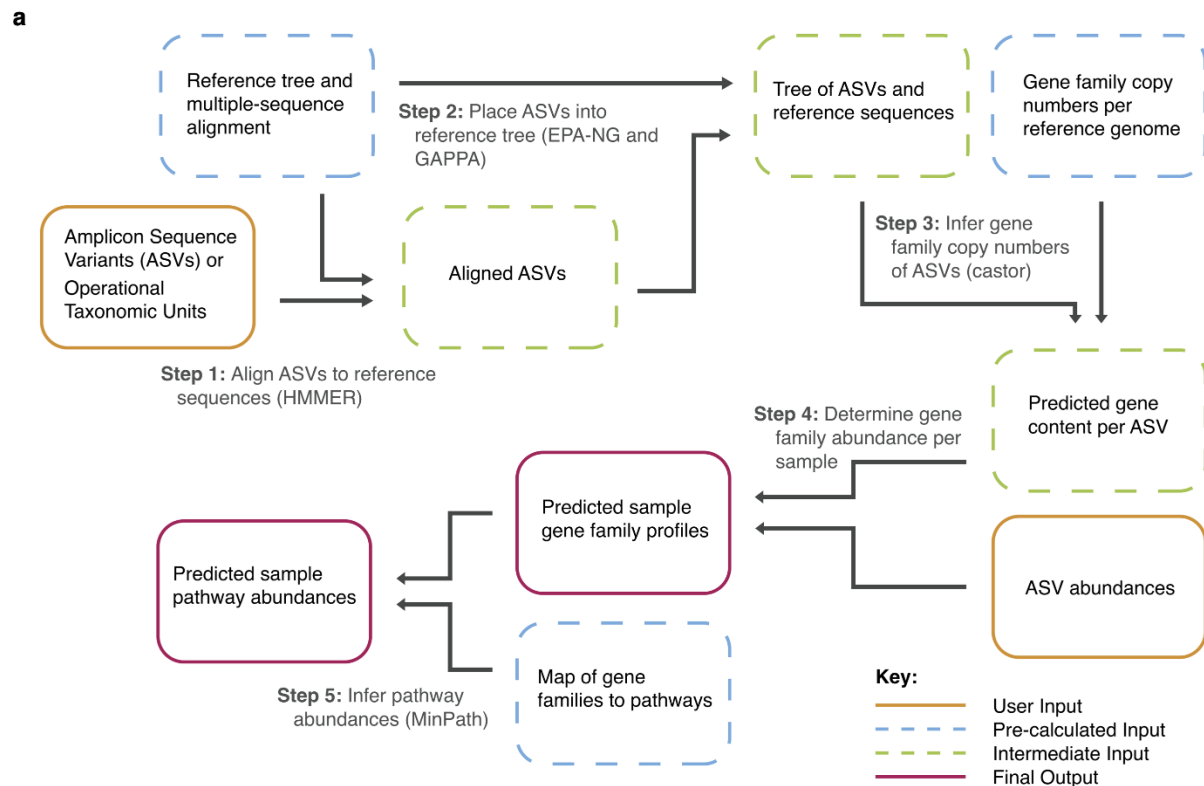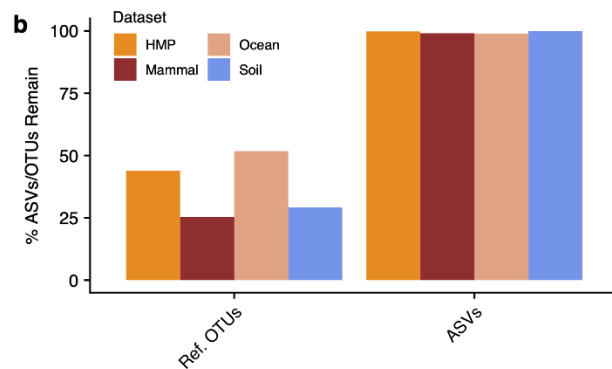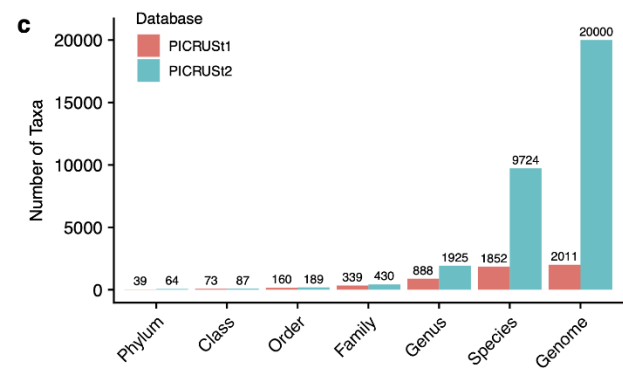

4

5 **Figure 1: PICRUSt2 algorithm and major updates.** (a) The PICRUSt2 method consists of  
 6 phylogenetic placement, hidden-state-prediction, and sample-wise gene and pathway abundance  
 7 tabulation. ASV sequences and abundances are taken as input, and gene family and pathway abundances  
 8 are output. All necessary reference tree and trait databases for the default workflow are included in the  
 9 PICRUSt2 implementation. (b) The default PICRUSt1 pipeline restricted predictions to reference  
 10 operational taxonomic units (Ref. OTUs) within the Greengenes database. This requirement resulted in

1 the exclusion of many study sequences across four representative 16S rRNA gene sequencing datasets. In  
2 contrast, PICRUSt2 relaxes this requirement and is agnostic to whether the input sequences are within a  
3 reference or not, which results in almost all of the input amplicon sequence variants (ASVs) being  
4 retained in the final output. (c) A drastic increase in the taxonomic diversity within the default PICRUSt2  
5 database is observed compared to PICRUSt1.  
6

7 PICRUSt2 predictions based on the following gene family databases are supported by  
8 default: Kyoto Encyclopedia of Genes and Genomes<sup>14</sup> (KEGG) orthologs (KO), Enzyme  
9 Classification numbers (EC numbers), Clusters of Orthologous Genes<sup>15</sup> (COGs), Protein  
10 families<sup>16</sup> (Pfam) and The Institute for Genomic Research's database of protein FAMILies<sup>17</sup>  
11 (TIGRFAM) (**Supp Table 1**). PICRUSt2 distinctly improves on PICRUSt1 by including gene  
12 families more recently added to the KEGG database. Specifically, the total number of KOs has  
13 now increased from 6,911 to 10,543 (1.5-fold increase) in PICRUSt2 compared to PICRUSt1.

14 We validated PICRUSt2 metagenome predictions using samples from seven published  
15 datasets that have been profiled both by 16S rRNA marker gene sequencing and shotgun  
16 metagenomics sequencing (MGS). These included three human-associated microbiome datasets:  
17 57 stool samples from Cameroonian individuals<sup>18,19</sup>, 91 stool samples from Indian individuals<sup>20</sup>,  
18 and 137 samples spanning the human body (from the Human Microbiome Project<sup>21</sup> [HMP]).  
19 These validation datasets also included non-human associated environments, including: 77 non-  
20 human primate stool samples<sup>22</sup>, eight mammalian stool samples<sup>23</sup>, six ocean samples<sup>24</sup>, and 22  
21 bulk soil and blueberry rhizosphere samples<sup>25</sup>. These datasets span varying degrees of challenge  
22 for accurate metagenome inference due to environmental and technical factors (**Supp Table 2**).

23 We generated PICRUSt2 KO predictions from 16S rRNA marker gene data for each  
24 dataset. We compared these predictions to KO relative abundances profiled from the  
25 corresponding MGS metagenomes, which served as a gold-standard to evaluate prediction  
26 performance. We performed the same analysis with four alternative functional prediction

1 pipelines: PICRUSt1, Piphillin, PanFP, and Tax4Fun2. We calculated Spearman correlation  
 2 coefficients (hereafter “correlations”) for matching samples between the predicted KO  
 3 abundance and MGS KO abundance tables after filtering all tables to the 6,220 KOs that could  
 4 be output by all tested databases (**Fig 2**). The correlation metric represents the similarity in rank  
 5 ordering of KO abundances between the predicted and observed data. The correlations based on  
 6 PICRUSt2 KO predictions ranged from a mean of 0.79 (standard deviation [sd] = 0.028; primate  
 7 stool) to 0.88 (sd = 0.019; Cameroonian stool dataset). For all seven datasets, PICRUSt2  
 8 predictions either performed best or were comparable to the best prediction method (paired-  
 9 sample, two-tailed Wilcoxon tests [PTW]  $P < 0.05$ ). Correlations based on PICRUSt2  
 10 predictions were notably higher for non-human associated datasets. This result could indicate an  
 11 advantage of phylogenetic-based methods over non-phylogenetic-based methods, such as  
 12 Piphillin, for environments poorly represented by reference genomes.

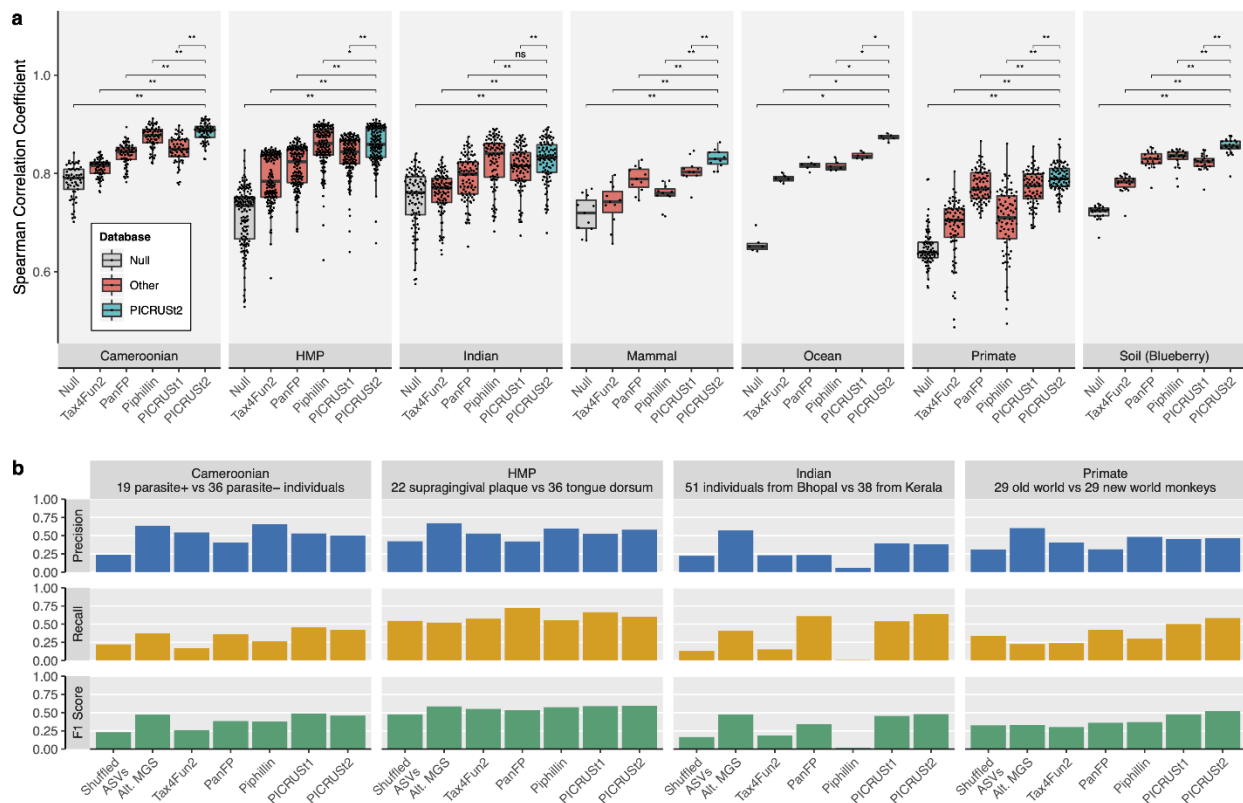

1 **Figure 2: PICRUSt2 performs best or is comparable to other tools based on Spearman correlation**  
2 **coefficients and differential abundance results.** Validation results of PICRUSt2 KEGG ortholog (KO)  
3 predictions comparing metagenome prediction performance against gold-standard shotgun metagenomic  
4 sequencing (MGS). (a) Boxplots represent medians and interquartile ranges of Spearman correlation  
5 coefficients observed in stool samples from Cameroonian individuals (n=57), the human microbiome  
6 project (HMP, n=137), stool samples from Indian individuals (n=91), non-human primate stool samples  
7 (n=77), mammalian stool (n=8), ocean water (n=6), and blueberry soil (n=22) datasets. The significance  
8 of paired-sample, two-tailed Wilcoxon tests is indicated above each tested grouping (\*, \*\*, and ns  
9 correspond to  $P < 0.05$ ,  $P < 0.001$ , and not significant respectively). Note that the y-axis is truncated  
10 below 0.5 rather than 0 to better visualize small differences between categories. (b) Comparison of  
11 significantly differentially abundant KOs between predicted metagenomes and MGS. Precision, recall,  
12 and F1 score are reported for each category compared to the MGS data. Precision corresponds to the  
13 proportion of significant KOs for that category also significant in the MGS data. Recall corresponds to the  
14 proportion of significant KOs in the MGS data also significant for that category. The F1 score is the  
15 harmonic mean of these metrics. The subsets of the four datasets tested (which were the only ones with  
16 adequate sample sizes for this analysis) and the sample groupings compared are indicated above each  
17 panel. The parasite referred to for the Cameroonian dataset is *Entamoeba*. Wilcoxon tests were performed  
18 on the KO relative abundances after normalizing by the median number of universal single-copy genes in  
19 each sample. Significance was defined as a false discovery rate  $< 0.05$ . The “shuffled ASVs” category  
20 corresponds to PICRUSt2 predictions with ASV labels shuffled across a dataset (see Supplementary  
21 Text). The “Alt. MGS” category corresponds to an alternative MGS processing pipeline where reads were  
22 aligned directly to the KEGG database rather than the default HUMAnN2 pipeline.  
23

24 Gene families regularly co-occur within genomes, and so the use of correlations to assess  
25 gene-table similarity may be limited by the lack of independence of gene families within a  
26 sample (**Supp Fig 2**). To address this dependency, we compared the observed correlations  
27 between paired MGS and predicted metagenomes to correlations between MGS functions and a  
28 null reference genome, comprised of the mean gene family abundance across all reference  
29 genomes. For all datasets, PICRUSt2 metagenome tables were more similar to MGS values than  
30 the null (**Fig 2a**). However, this increase over the null expectation is predominately driven by  
31 each dataset’s predicted genome content (rather than that of individual samples). This is  
32 demonstrated by the fact that these correlations are actually only slightly significantly higher  
33 than those observed when ASV labels are shuffled within a dataset (**Supp Fig 3**). The observed  
34 correlations for the shuffled ASVs ranged from a mean of 0.77 (sd = 0.196; primate stool) to  
35 0.84 (sd = 0.178; blueberry rhizosphere). Biologically these results are consistent with several



1 patterns. First, gene families are correlated in copy number across diverse taxa (as captured by  
2 the ‘Null’ dataset). Second, these correlations are stronger within than between environments (as  
3 shown by the difference between the ‘Null’ and ‘Shuffled ASV’ results). Lastly, environment-to-  
4 environment differences tend to be larger than sample-to-sample differences within an  
5 environment (as shown by the differences between PICRUSt2 predictions and the ‘Shuffled  
6 ASV’ results).

7 A complementary approach for validating metagenome predictions is to compare the  
8 results of differential abundance tests on 16S-predicted metagenomes to MGS data. A recent  
9 analysis of Piphillin suggested that this tool out-performs PICRUSt2 based on this approach<sup>26</sup>.  
10 We similarly performed this evaluation on the KO predictions for four validation datasets (**Fig**  
11 **2b**; see Supplementary Text). Overall, PICRUSt2 displayed the highest F1 score, the harmonic  
12 mean of precision and recall, compared to other prediction methods (ranging from 0.46-0.59;  
13 mean=0.51; sd=0.06). However, all prediction tools displayed relatively low precision, the  
14 proportion of significant KOs that were also significant in the MGS data. In particular, precision  
15 ranged from 0.38-0.58 (mean=0.48; sd=0.08) for PICRUSt2 and 0.06-0.66 (mean=0.45; sd=0.27)  
16 for Piphillin. In all cases, PICRUSt2 predictions out-performed ASV-shuffled predictions, which  
17 ranged in precision from 0.22-0.42 (mean=0.30; sd=0.09). In addition, differential abundance  
18 tests performed on MGS-derived KOs from an alternative MGS-processing workflow resulted in  
19 only marginally higher precision (ranging from 0.57-0.67; mean=0.62; sd=0.04). Taken together,  
20 these results highlight the difficulty of reproducing microbial functional biomarkers with both  
21 predicted and actual metagenomics data.

22 MetaCyc pathway abundances are now the main high-level predictions output by  
23 PICRUSt2 by default. The MetaCyc database is an open-source alternative to KEGG and is also

1 a major focus of the widely-used metagenomics functional profiler, HUMAnN2<sup>27</sup>. MetaCyc  
2 pathway abundances are calculated in PICRUSt2 through structured mappings of EC gene  
3 families to pathways. These pathway predictions performed better than the null distribution for  
4 all metrics overall (PTW  $P < 0.05$ ; **Fig 3a** and **Supp Fig 4-5**) compared to MGS-derived  
5 pathways. Similar to our previous analysis, shuffled ASV predictions representing overall  
6 functional structure within each dataset accounted for the majority of this signal (**Supp Fig 4**). In  
7 addition, differential abundance tests on these pathways showed high variability in F1 scores  
8 across datasets and statistical methods with the ASV shuffled predictions contributing the  
9 majority of this signal (**Supp Fig 6**; F1 scores ranged from 0.23-0.62 (mean=0.41; sd=0.17) and  
10 0.22-0.60 (mean=0.34; sd=0.18) for the observed and ASV shuffled PICRUSt2 predictions,  
11 respectively). Again, these results suggest that identifying robust differentially abundant  
12 metagenome-wide pathways is difficult and highlights the challenge of analyzing microbial  
13 pathways in general.

14 Predictions for 41 microbial phenotypes, which are linked to IMG genomes<sup>28</sup>, can also  
15 now be generated with PICRUSt2. These represent high-level microbial metabolic activities such  
16 as “Glucose utilizing” and “Denitrifier” that are annotated as present or absent within each  
17 reference genome. Use of this database was motivated by the predictions made by the tools  
18 FAPROTAX<sup>29</sup> and Bugbase<sup>30</sup>. We performed a hold-out validation to assess the performance of  
19 PICRUSt2 phenotype predictions, which involved comparing the binary phenotype predictions  
20 to the expected phenotypes for each reference genome. Based on F1 score (mean=84.8%;  
21 sd=9.01%), precision (mean=86.5%; sd=6.21%), and recall (mean=83.5%; sd=11.4%), these  
22 predictions performed significantly better than the null expectation (**Fig 3b**; Wilcoxon tests  $P <$   
23 0.05).

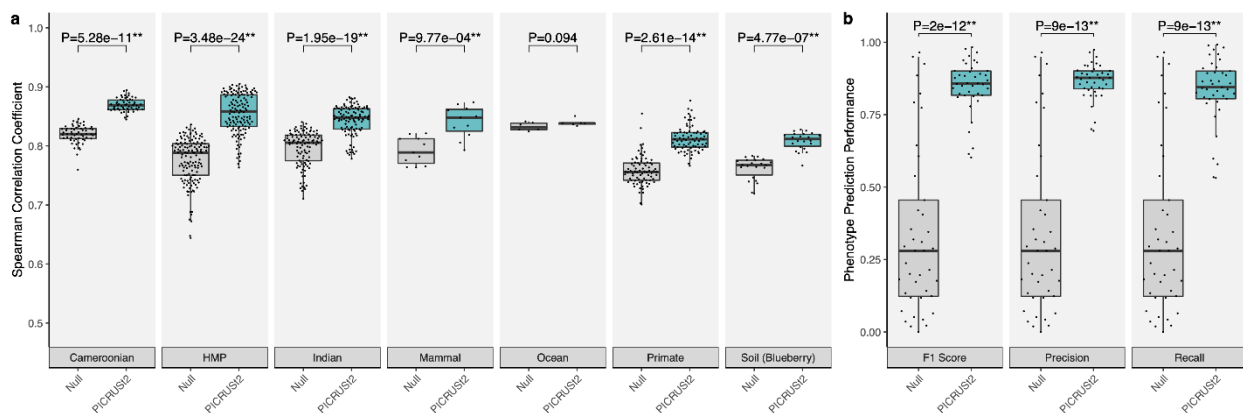

1  
2 **Figure 3: PICRUSt2 accurately predicts MetaCyc pathways and phenotypes for characterizing**  
3 **overall environments.** (a) Spearman correlation coefficients between PICRUSt2 predicted pathway  
4 abundances and gold-standard metagenomic sequencing (MGS). Results are shown for each validation  
5 dataset: stool from Cameroonian individuals, The Human Microbiome Project (HMP), stool from Indian  
6 individuals, mammalian stool, ocean water, non-human primate stool, and blueberry soil. These results  
7 are limited to the 575 pathways that could potentially be identified by PICRUSt2 and HUMAN2. (b)  
8 Performance of binary phenotype predictions based on three metrics: F1 score, precision, and recall. Each  
9 point corresponds to one of the 41 phenotypes tested. Predictions assessed here are based on holding out  
10 each genome individually, predicting the phenotypes for that holdout genome, and comparing the  
11 predicted and observed values. The null distribution in this case is based on randomizing the phenotypes  
12 across the reference genomes and comparing to the actual values, which results in the same output for all  
13 three metrics. The P-values of paired-sample, two-tailed Wilcoxon tests is indicated above each tested  
14 grouping (\* and \*\* correspond to  $P < 0.05$  and  $P < 0.001$ , respectively). Note that in panel a the y-axis is  
15 truncated below 0.5 rather than 0 to better visualize small differences between categories. The sample  
16 sizes in panel a are 57 (Cameroonian), 137 (HMP), 91 (Indian), 8 (mammal), 6 (ocean), 77 (primate), and  
17 22 (soil).

18  
19 There are two major criticisms of amplicon-based functional prediction. First, the  
20 predictions are biased towards existing reference genomes, which means that rare environment-  
21 specific functions are less likely to be identified. This limitation will be partially addressed as the  
22 number of high-quality available genomes continues to grow. Moreover, PICRUSt2 allows user-  
23 specified genomes to be used for generating predictions, which provides a flexible framework for  
24 studying particular environments. The second major criticism is that amplicon-based predictions  
25 cannot provide resolution to distinguish strain-specific functionality within the same species.  
26 This is an important limitation of PICRUSt2 and any amplicon-based analysis, which can only  
27 differentiate taxa to the degree they differ at the amplified marker gene sequence.

1           In summary, PICRUST2 is a more flexible and accurate method for performing marker  
2 gene metagenome inference. We have highlighted the improved performance of PICRUST2  
3 compared to other metagenome inference methods while also describing limitations with  
4 identifying consistent differentially abundant functions in microbiome studies. We hope that the  
5 expanded functionality of PICRUST2 will continue to allow researchers to identify potentially  
6 novel insights into functional microbial ecology from amplicon sequencing profiles.

### 7 8 **Code and data availability**

9 PICRUST2 is available at: <https://github.com/picrust/picrust2>. The Python and R code used for  
10 the analyses and database construction described in this paper are available online at  
11 [https://github.com/gavinmdouglas/picrust2\\_manuscript](https://github.com/gavinmdouglas/picrust2_manuscript). This repository also includes the  
12 processed datafiles that can be used to re-generate the findings in this paper. The accessions for  
13 all sequencing data used in this study are listed in the supplementary information.

### 14 15 **Acknowledgements**

16 We would like to thank Zhenjiang Xu and Amy Chen for providing us access to datafiles used  
17 for testing and the default reference database. We would also like to thank Heather McIntosh for  
18 her help designing the pipeline flowchart. GMD is funded by a Natural Sciences and Engineering  
19 Research Council (NSERC) Alexander Graham Bell Graduate Scholarship (Doctoral). VM is  
20 funded by an NIH/NIAAA Ruth L. Kirschstein National Research Service Award (F30  
21 AA026527). MGIL is funded by an NSERC Discovery Grant and an NSERC Collaborative  
22 Research Development with co-funding from GlaxoSmithKline to MGIL and JB. CH is funded

1 in part by NIH NIDDK grants U54DK102557 and R24DK110499. SYN is funded by an NSERC  
2 Discovery Grant.

3

#### 4 **References**

- 5 1. Langille, M. G. I. *et al.* Predictive functional profiling of microbial communities using  
6 16S rRNA marker gene sequences. *Nat. Biotechnol.* **31**, 814–821 (2013).
- 7 2. Aßhauer, K. P., Wemheuer, B., Daniel, R. & Meinicke, P. Tax4Fun: Predicting functional  
8 profiles from metagenomic 16S rRNA data. *Bioinformatics* **31**, 2882–2884 (2015).
- 9 3. Jun, S. R., Robeson, M. S., Hauser, L. J., Schadt, C. W. & Gorin, A. A. PanFP:  
10 Pangenome-based functional profiles for microbial communities. *BMC Res. Notes* **8**, 497  
11 (2015).
- 12 4. Bowman, J. S. & Ducklow, H. W. Microbial communities can be described by metabolic  
13 structure: A general framework and application to a seasonally variable, depth-stratified  
14 microbial community from the coastal West Antarctic Peninsula. *PLoS One* **10**, e0135868  
15 (2015).
- 16 5. Iwai, S. *et al.* Piphillin: Improved prediction of metagenomic content by direct inference  
17 from human microbiomes. *PLoS One* **11**, e0166104 (2016).
- 18 6. Wemheuer, F. *et al.* Tax4Fun2: a R-based tool for the rapid prediction of habitat-specific  
19 functional profiles and functional redundancy based on 16S rRNA gene marker gene  
20 sequences. *bioRxiv* (2018).

- 1 7. DeSantis, T. Z. *et al.* Greengenes, a chimera-checked 16S rRNA gene database and  
2 workbench compatible with ARB. *Appl. Environ. Microbiol.* **72**, 5069–5072 (2006).
- 3 8. Callahan, B. J. *et al.* DADA2: High resolution sample inference from amplicon data. *Nat.*  
4 *Methods* **13**, 581–583 (2016).
- 5 9. Markowitz, V. M. *et al.* IMG: The integrated microbial genomes database and  
6 comparative analysis system. *Nucleic Acids Res.* **40**, 115–122 (2012).
- 7 10. Barbera, P. *et al.* EPA-ng: Massively Parallel Evolutionary Placement of Genetic  
8 Sequences. *Syst. Biol.* **68**, 365–369 (2019).
- 9 11. Czech, L. & Stamatakis, A. Scalable methods for analyzing and visualizing phylogenetic  
10 placement of metagenomic samples. *PLoS One* **14**, e0217050 (2019).
- 11 12. Louca, S. & Doebeli, M. Efficient comparative phylogenetics on large trees.  
12 *Bioinformatics* **34**, 1053–1055 (2018).
- 13 13. Paradis, E., Claude, J. & Strimmer, K. APE: Analyses of phylogenetics and evolution in R  
14 language. *Bioinformatics* **20**, 289–290 (2004).
- 15 14. Kanehisa, M., Goto, S., Sato, Y., Furumichi, M. & Tanabe, M. KEGG for integration and  
16 interpretation of large-scale molecular data sets. *Nucleic Acids Res.* **40**, 109–114 (2012).
- 17 15. Tatusov, R. L., Galperin, M. Y., Natale, D. A. & Koonin, E. V. The COG database: a tool  
18 for genome-scale analysis of protein functions and evolution. *Nucleic Acids Res.* **28**, 33–  
19 36 (2000).
- 20 16. Finn, R. D. *et al.* Pfam: The protein families database. *Nucleic Acids Res.* **42**, 222–230

- 1 (2014).
- 2 17. Haft, D. H., Selengut, J. D. & White, O. The TIGRFAMs database of protein families.  
3 *Nucleic Acids Res.* **31**, 371–373 (2003).
- 4 18. Morton, E. R. *et al.* Variation in Rural African Gut Microbiota Is Strongly Correlated with  
5 Colonization by *Entamoeba* and Subsistence. *PLoS Genet.* **11**, e1005658 (2015).
- 6 19. Lokmer, A. *et al.* Use of shotgun metagenomics for the identification of protozoa in the  
7 gut microbiota of healthy individuals from worldwide populations with various  
8 industrialization levels. *PLoS One* **14**, e0211139 (2019).
- 9 20. Dhakan, D. B. *et al.* The unique composition of Indian gut microbiome, gene catalogue,  
10 and associated fecal metabolome deciphered using multi-omics approaches. *Gigascience*  
11 **8**, 1–20 (2019).
- 12 21. Huttenhower, C. *et al.* Structure, function and diversity of the healthy human microbiome.  
13 *Nature* **486**, 207–214 (2012).
- 14 22. Amato, K. R. *et al.* Evolutionary trends in host physiology outweigh dietary niche in  
15 structuring primate gut microbiomes. *ISME J.* **13**, 576–587 (2019).
- 16 23. Finlayson-Trick, E. C. L. *et al.* Taxonomic differences of gut microbiomes drive  
17 cellulolytic enzymatic potential within hind-gut fermenting mammals. *PLoS One* **12**,  
18 e0189404 (2017).
- 19 24. Gillies, L. E., Thrash, J. C., deRada, S., Rabalais, N. N. & Mason, O. U. Archaeal  
20 enrichment in the hypoxic zone in the northern Gulf of Mexico. *Environ. Microbiol.* **17**,

- 1 3847–3856 (2015).
- 2 25. Yurgel, S. N., Nearing, J. T., Douglas, G. M. & Langille, M. G. I. Metagenomic  
3 Functional Shifts to Plant Induced Environmental Changes. *Front. Microbiol.* **10**, 1682  
4 (2019).
- 5 26. Narayan, N. R. *et al.* Piphillin predicts metagenomic composition and dynamics from  
6 DADA2-corrected 16S rDNA sequences. *BMC Genomics* **21**, 56 (2020).
- 7 27. Franzosa, E. A. *et al.* Species-level functional profiling of metagenomes and  
8 metatranscriptomes. *Nat. Methods* **15**, 962–968 (2018).
- 9 28. Chen, I. M. A. *et al.* Improving Microbial Genome Annotations in an Integrated Database  
10 Context. *PLoS One* **8**, e54859 (2013).
- 11 29. Louca, S., Parfrey, L. W. & Doebeli, M. Decoupling function and taxonomy in the global  
12 ocean microbiome. *Science* **353**, 1272–1277 (2016).
- 13 30. Ward, T. *et al.* BugBase predicts organism-level microbiome phenotypes. *bioRxiv* (2017).
- 14
